# Supplementary material for: Modeling elongational viscosity and brittle fracture of polystyrene solutions
Source: Springer Nature journal article supplement (doi:10.1007/s00397-021-01277-1), 2021-06-14
Supplement: MOESM1 [file 19260122]

**Support Information for**  
**Modelling Elongational Viscosity and Brittle Fracture**  
**of Polystyrene Solutions**

Manfred H. Wagner<sup>1</sup>, Esmail Narimissa<sup>2,3</sup>, Leslie Poh<sup>2,3</sup>, and Taisir Shahid<sup>4,5</sup>

<sup>1</sup> *Polymer Engineering/Polymer Physics, Berlin Institute of Technology (TU Berlin),  
Fasanenstrasse 90, 10623 Berlin, Germany*

<sup>2</sup> *Dept. of Chemical Engineering, Technion–Israel Institute of Technology (IIT), Technion  
City, Haifa 32 000, Israel*

<sup>3</sup> *Dept. of Chemical Engineering, Guangdong Technion–Israel Institute of Technology  
(GTIIT), Shantou 515063, China*

<sup>4</sup> *Bio and Soft Matter, Institute on Condensed Matter and Nano-science, Université catholique  
de Louvain, Louvain-la-Neuve, Belgium*

<sup>5</sup> *DSM Materials Science Center, P.O. Box 18, NL-6160 MD Geleen, The Netherlands*

## LVE Characterization

**Table S1.** Discrete relaxation spectra from mastercurves of  $G'$  and  $G''$  at  $T=T_g+23.4K$  obtained by IRIS (Winter and Mours 2006).

| <b>PS-820k/8.8k-50</b> |              | <b>PS-820k/8.8k-40</b> |              | <b>PS-820k/8.8kk-30</b> |              |
|------------------------|--------------|------------------------|--------------|-------------------------|--------------|
| $g_i$ [Pa]             | $\tau_i$ [s] | $g_i$ [Pa]             | $\tau_i$ [s] | $g_i$ [Pa]              | $\tau_i$ [s] |
| 4.933e+007             | 3.560e-004   | 4.625e+007             | 3.663e-004   | 6.178e+006              | 4.842e-003   |
| 5.753e+005             | 2.383e-002   | 6.038e+005             | 2.318e-002   | 3.484e+005              | 7.867e-002   |
| 2.305e+005             | 1.033e-001   | 2.445e+005             | 9.691e-002   | 8.149e+004              | 2.600e-001   |
| 6.774e+004             | 4.505e-001   | 5.242e+004             | 4.265e-001   | 2.991e+004              | 1.168e+000   |
| 3.091e+004             | 2.928e+000   | 2.464e+004             | 1.746e+000   | 1.234e+004              | 6.914e+000   |
| 9.987e+003             | 2.027e+001   | 1.322e+004             | 1.175e+001   | 4.441e+003              | 3.524e+001   |
| 6.592e+003             | 9.273e+001   | 5.099e+003             | 6.592e+001   | 3.630e+003              | 1.674e+002   |
| 6.906e+003             | 3.863e+002   | 5.712e+003             | 2.904e+002   | 3.434e+003              | 7.350e+002   |
| 7.919e+003             | 1.589e+003   | 5.953e+003             | 1.306e+003   | 3.875e+003              | 3.040e+003   |
| 8.241e+003             | 6.034e+003   | 6.540e+003             | 5.417e+003   | 3.323e+003              | 1.232e+004   |
| 9.461e+003             | 2.265e+004   | 6.411e+003             | 2.250e+004   | 2.942e+003              | 3.593e+004   |
| 1.081e+004             | 7.507e+004   | 5.426e+003             | 6.012e+004   |                         |              |

| <b>PS-820k/8.8k-20</b> |              | <b>PS-820k/8.8k-10</b> |              | <b>PS-820k/8.8k-05</b> |              | <b>PS-820k/8.8kk-03</b> |              |
|------------------------|--------------|------------------------|--------------|------------------------|--------------|-------------------------|--------------|
| $g_i$ [Pa]             | $\tau_i$ [s] | $g_i$ [Pa]             | $\tau_i$ [s] | $g_i$ [Pa]             | $\tau_i$ [s] | $g_i$ [Pa]              | $\tau_i$ [s] |
| 4.440e+006             | 8.139e-003   | 6.634e+006             | 3.383e-003   | 4.376e+007             | 6.239e-004   | 1.306e+007              | 1.826e-003   |
| 3.130e+005             | 9.729e-002   | 2.175e+005             | 2.337e-001   | 4.144e+005             | 6.157e-002   | 2.306e+005              | 1.776e-001   |
| 5.533e+004             | 2.260e-001   | 7.096e+003             | 1.878e+000   | 1.204e+005             | 1.391e-001   | 6.300e+003              | 2.013e-001   |
| 2.802e+004             | 8.880e-001   | 3.847e+003             | 7.620e+000   | 6.254e+003             | 6.226e-001   | 1.808e+003              | 5.655e+000   |
| 9.673e+003             | 5.528e+000   | 1.701e+003             | 3.851e+001   | 3.641e+003             | 2.273e+000   | 6.160e+002              | 3.513e+001   |
| 4.118e+003             | 2.604e+001   | 7.349e+002             | 1.725e+002   | 1.800e+003             | 1.214e+001   | 2.123e+002              | 1.868e+002   |
| 2.634e+003             | 1.519e+002   | 6.471e+002             | 7.050e+002   | 6.689e+002             | 6.651e+001   | 1.304e+002              | 8.035e+002   |
| 2.217e+003             | 7.589e+002   | 6.762e+002             | 3.671e+003   | 3.296e+002             | 3.712e+002   | 1.010e+001              | 3.614e+003   |
| 2.098e+003             | 3.461e+003   | 1.247e+001             | 4.866e+004   | 1.985e+002             | 1.783e+003   |                         |              |
| 1.964e+003             | 1.421e+004   |                        |              | 3.894e+000             | 3.125e+004   |                         |              |
| 8.457e+000             | 2.240e+005   |                        |              |                        |              |                         |              |

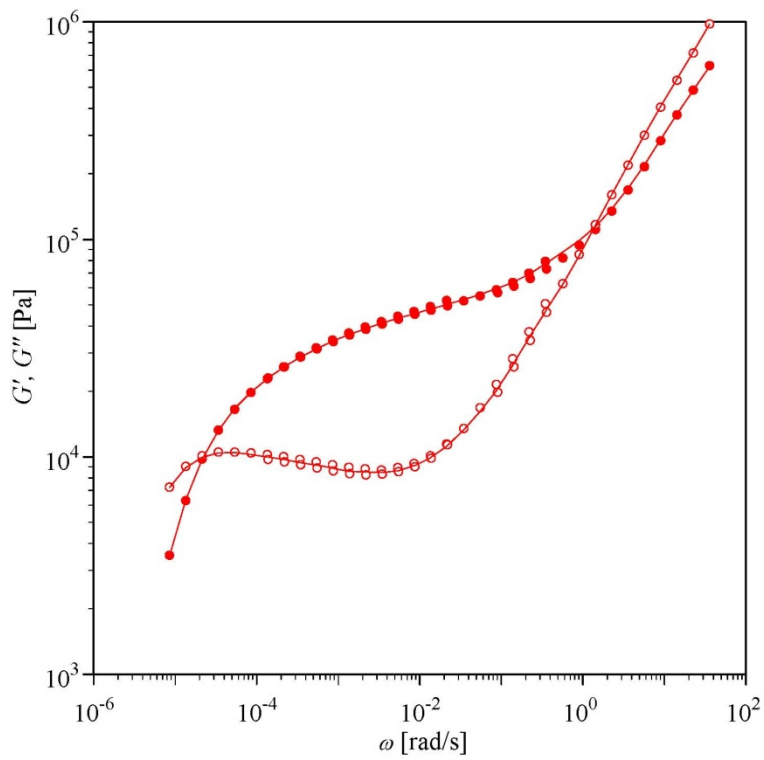

a) PS-820k/8.8k-50

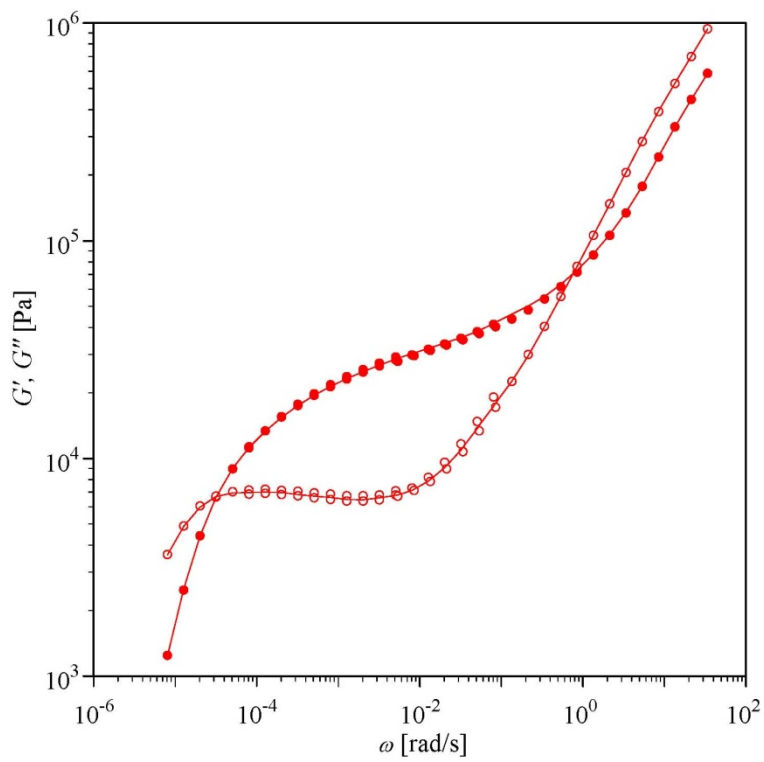

b) PS-820k/8.8k-40

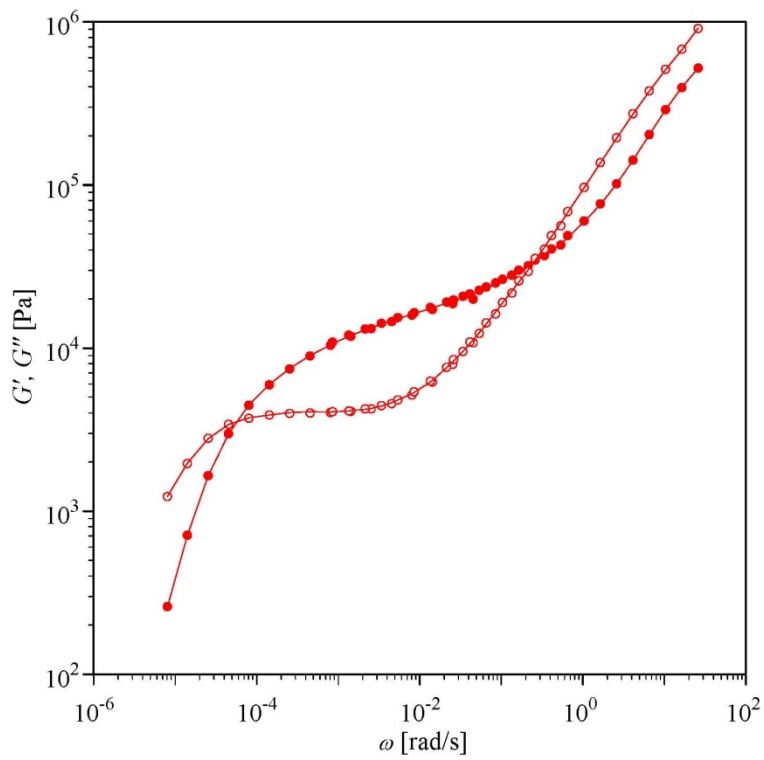

c) PS-820k/8.8k-30

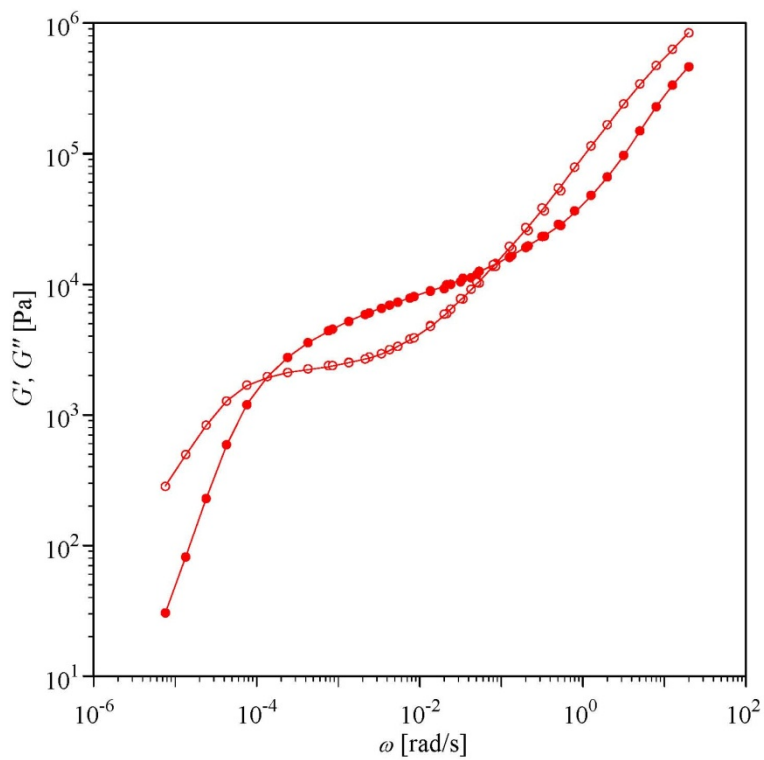

d) PS-820k/8.8k-20

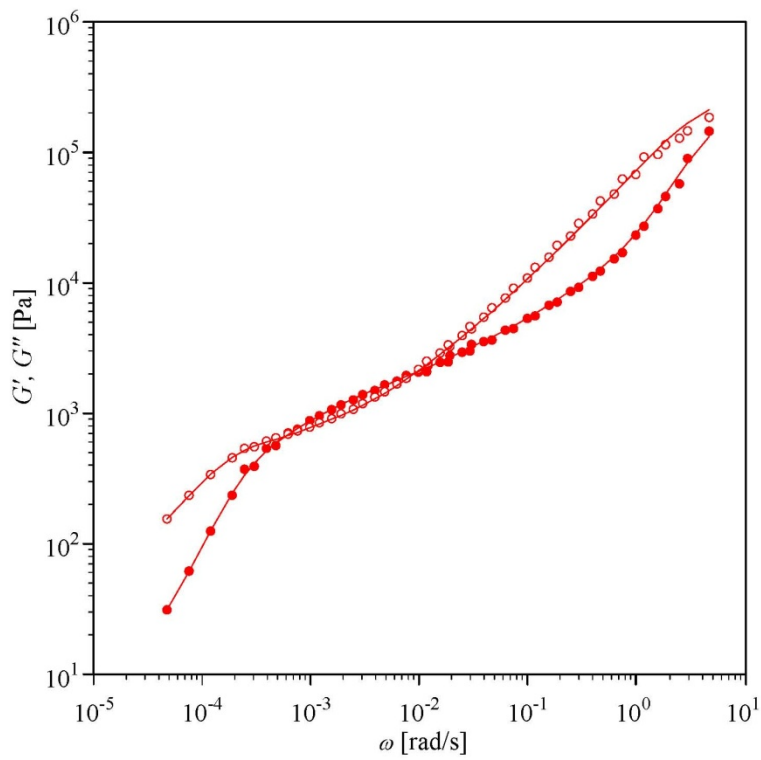

e) PS-820k/8.8k-10

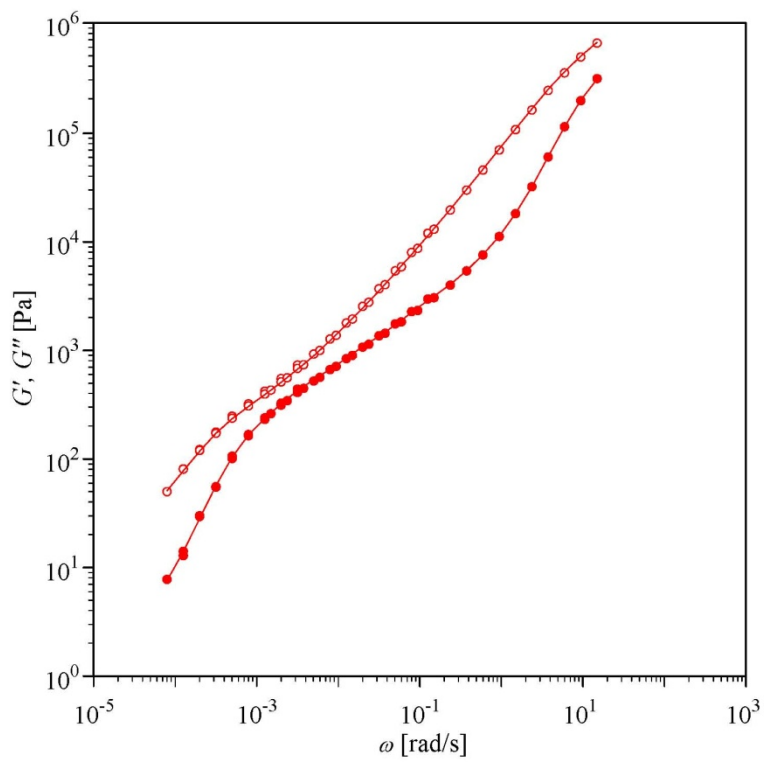

f) PS820k/8.8k-05

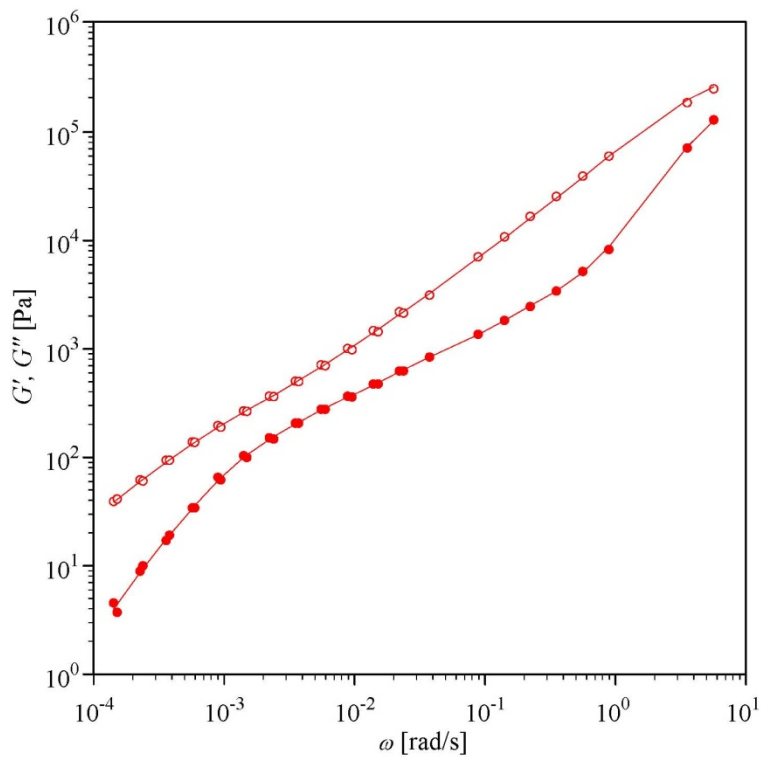

g) PS-820k/8.8k-03

**Fig. S1 (a)-(g):** Mastercurves of  $G'$  and  $G''$  (symbols) at iso- $T_g$  temperatures  $T_0$ , i.e. temperatures with equal distance to the glass transition temperature  $T_g$  with  $T_0 = T_g + 23.4\text{K}$ , and fit by parsimonious relaxation spectra (red lines through data points) with parameters given in Table S1.

## Reference

Winter HH, Mours M (2006). The cyber infrastructure initiative for rheology. *Rheologica Acta* 45: 331-338.
